# Supplementary material
Source: PubMed Central journal article supplement (PMC8399785)
Supplement: 13063_2021_5521_MOESM2_ESM.pdf [file 13063_2021_5521_MOESM2_ESM.pdf]

**Figure 2: Participant Assessments**

| Time Point                            | S  | B | 1° Follow Up & Treatment Period |   |   |   |   |   |   |   |   |    |    |    |    |    |       | 2° Follow Up |
|---------------------------------------|----|---|---------------------------------|---|---|---|---|---|---|---|---|----|----|----|----|----|-------|--------------|
| Day                                   | <B | 0 | 1                               | 2 | 3 | 4 | 5 | 6 | 7 | 8 | 9 | 10 | 11 | 12 | 13 | 14 | 15-28 | 29-90        |
| Eligibility                           | X  |   |                                 |   |   |   |   |   |   |   |   |    |    |    |    |    |       |              |
| Consent                               | X  |   |                                 |   |   |   |   |   |   |   |   |    |    |    |    |    |       |              |
| Demographics <sup>1</sup>             |    | X |                                 |   |   |   |   |   |   |   |   |    |    |    |    |    |       |              |
| Medical History                       |    | X |                                 |   |   |   |   |   |   |   |   |    |    |    |    |    |       |              |
| Randomisation                         |    | X |                                 |   |   |   |   |   |   |   |   |    |    |    |    |    |       |              |
| Concomitant Medication                |    | X | X                               | X | X | X | X | X | X | X | X | X  | X  | X  | X  | X  | X     |              |
| Intervention Supply                   |    | X |                                 |   |   |   |   |   |   |   |   |    |    |    |    |    |       |              |
| Health Status Assessment <sup>2</sup> |    | X | X                               | X | X | X | X | X | X | X | X | X  | X  | X  | X  | X  | X     | X            |
| Medication Adherence                  |    | X | X                               | X | X | X | X | X | X | X | X | X  | X  | X  | X  | X  | X     |              |
| Blood Pressure                        |    | X | X                               | X | X | X | X | X | X | X | X | X  | X  | X  | X  | X  |       |              |
| Blood Pathology <sup>3</sup>          |    | X | X                               |   | X |   | X |   | X |   | X |    |    |    |    | X  |       |              |
| Hospitalisation & Mortality           |    |   |                                 |   |   |   |   |   |   |   |   |    |    |    |    |    |       | X            |

S = Screening, B = Baseline, 1° = Primary, 2° = Secondary

<sup>1</sup> Demographics includes: Date of Birth, Sex, Ethnicity, Weight, Height, Smoking Status, COVID-19 diagnosis, comorbidities

<sup>2</sup> Health Status Assessment includes: Hospital Admission status, Ventilation status, Supplemental Oxygen Status, Intensive Care Unit Admission status, Mortality status, Dialysis Status & Acute Kidney Injury status

<sup>3</sup> Blood Pathology includes: Potassium, Serum Creatinine, creatinine kinase, estimated glomerular filtration rate, white cell count, lymphocytes, D-dimer, C-reactive protein
